# Supplementary material for: Spatial disparities of ozone pollution in the Sichuan Basin spurred by extreme, hot weather
Source: Copernicus journal article supplement (doi:10.5194/acp-24-3029-2024), 2024-03-08
Supplement: Supplementary file 1 [file acp-24-3029-2024-supplement.pdf]

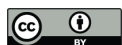

*Supplement of*

## **Spatial disparities of ozone pollution in the Sichuan Basin spurred by extreme, hot weather**

**Nan Wang et al.**

*Correspondence to:* Nan Wang (nan.wang@scu.edu.cn) and Fumo Yang (fmyang@scu.edu.cn)

The copyright of individual parts of the supplement might differ from the article licence.

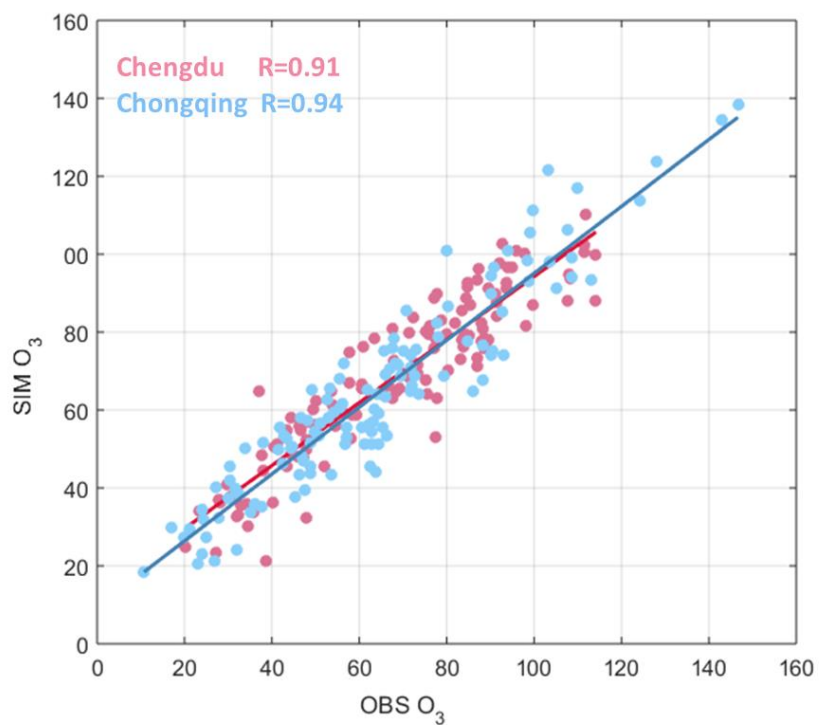

6  
7  
8

Fig S1 Comparison of machine learning simulated O<sub>3</sub> with observations in Chengdu and Chongqing

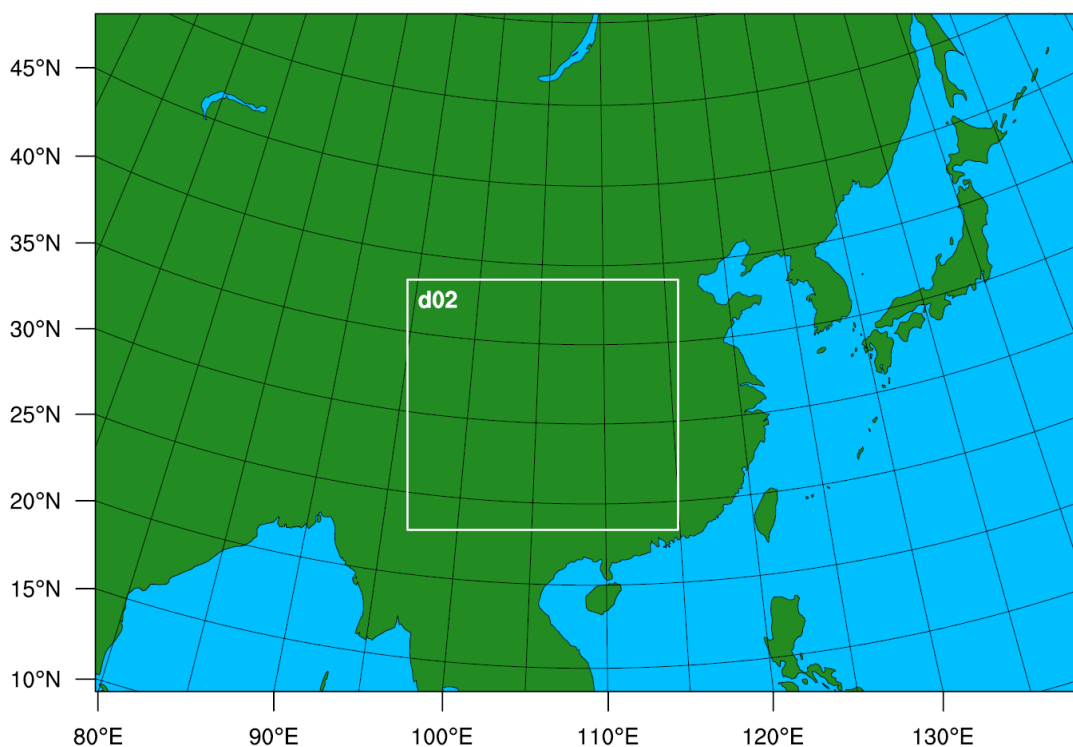

9

Fig S2 Domain coverage of the WRF-CMAQ model. The outer box shows the domain of d01 and the inner box shows the domain of d02.

10  
11  
12

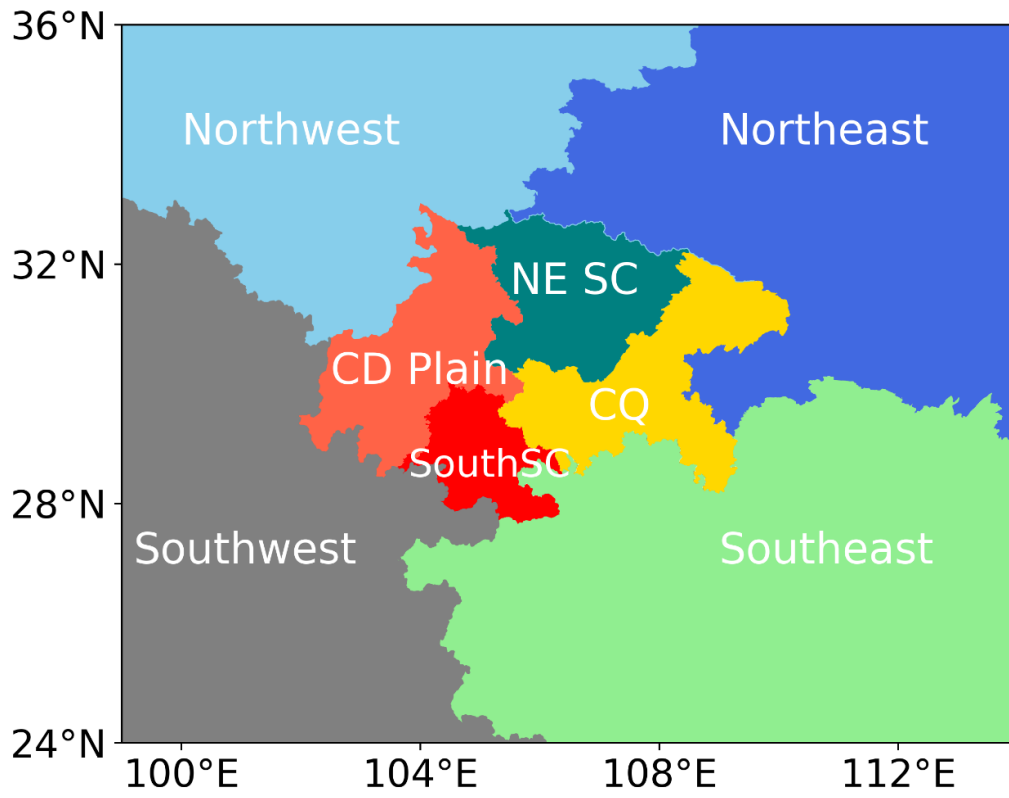

13  
14  
15

Fig S3 The map showing the tracked source regions in CMAQ-ISAM model.

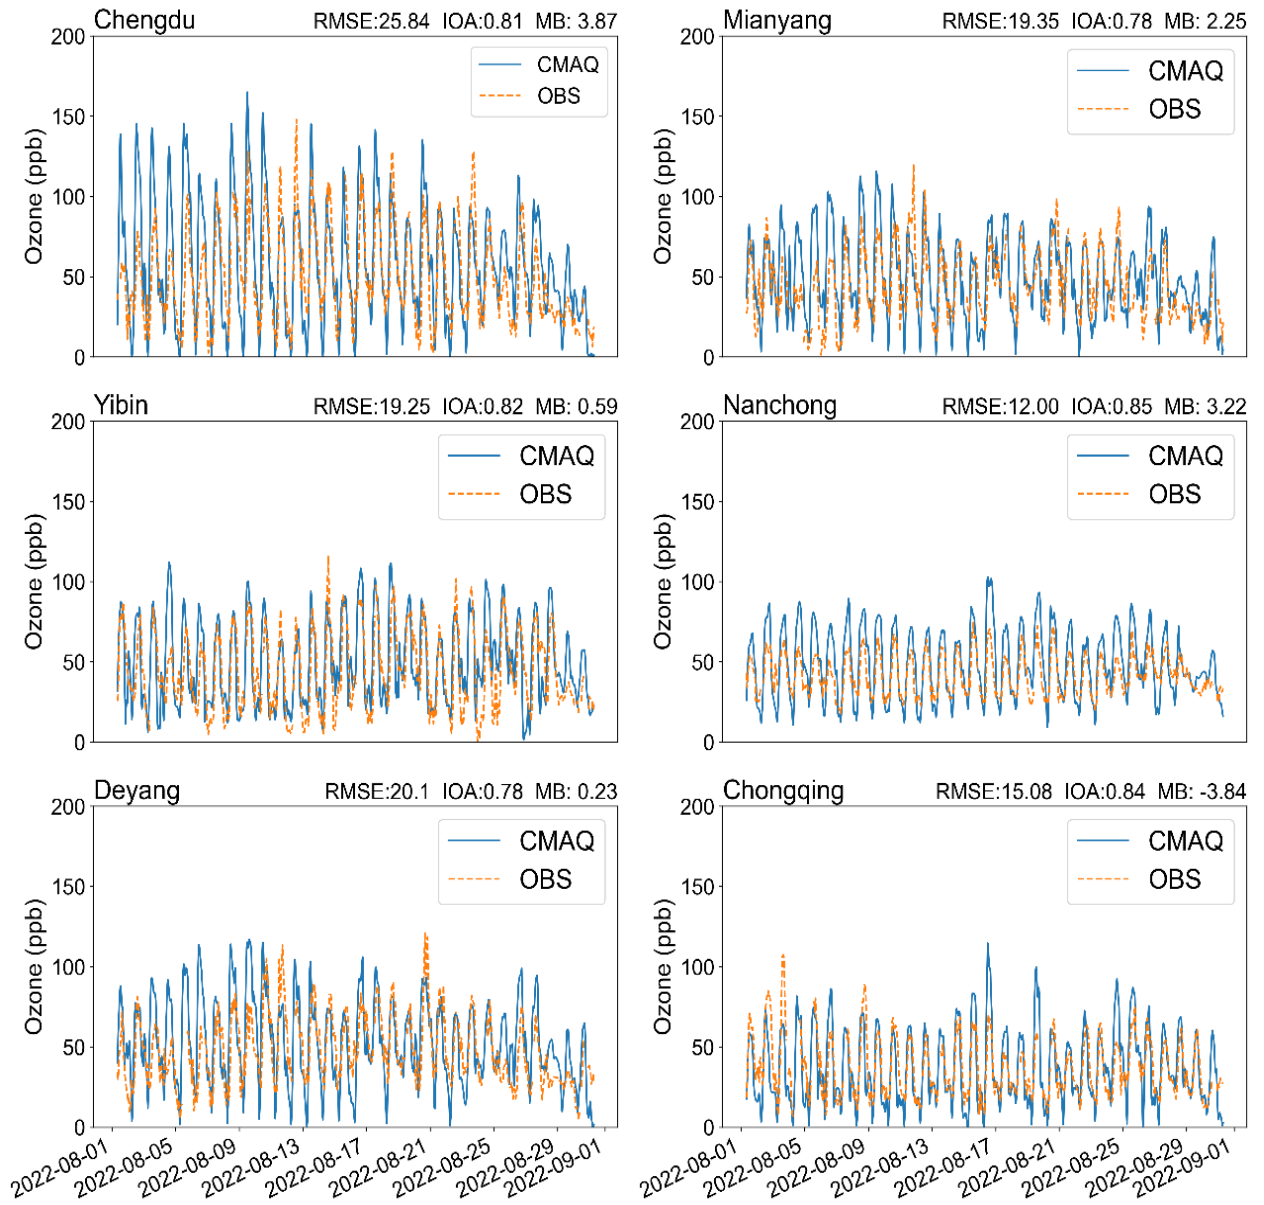

Fig S4 Comparison of the simulated and observed O<sub>3</sub> concentrations at different cities within the SCB regions.( RMSE stands for root mean square error; IOA stands for index of agreement and MB stands for mean bias)

16  
17  
18  
19  
20  
21  
22  
23  
24  
25  
26  
27  
28  
29  
30

31  
32  
33  
34  
35

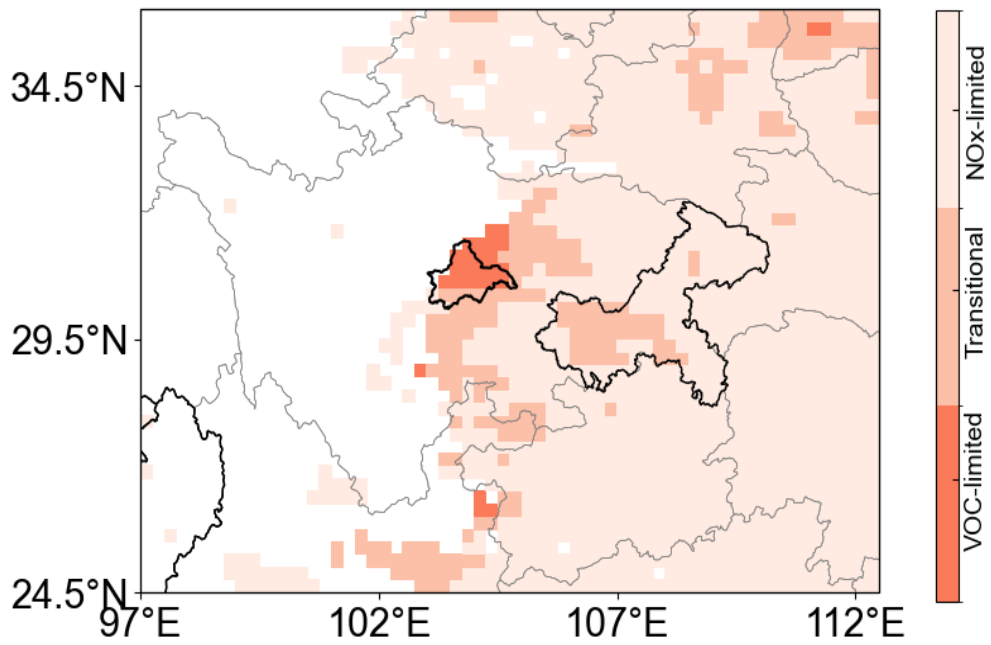

36  
37  
38  
39  
40

Fig S5 Spatial distribution of satellite diagnosed  $O_3$ - $NO_x$ -VOCs sensitivity in the SCB. (The regime was identified based on the ration of HCHO and  $NO_2$ )

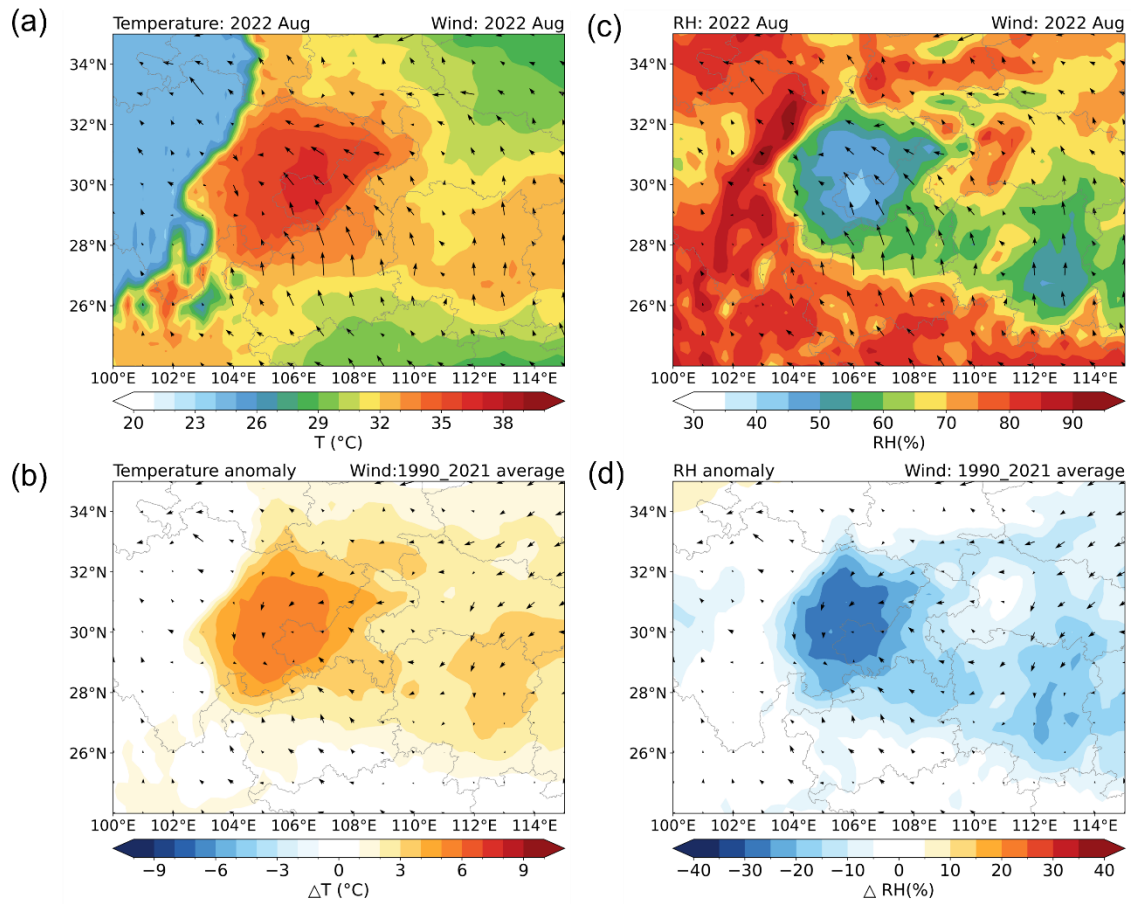

41  
 42 Fig S6 (a) Spatial distribution of temperature and winds at 1000 hPa during 2022 Aug; (b)  
 43 Spatial distribution of temperature anomaly (2022 – climate average) and the averaged  
 44 wind between 1990 and 2021; (c) Same as (a) but for relative humidity (RH); (d) Same as  
 45 (b) but for RH.  
 46  
 47

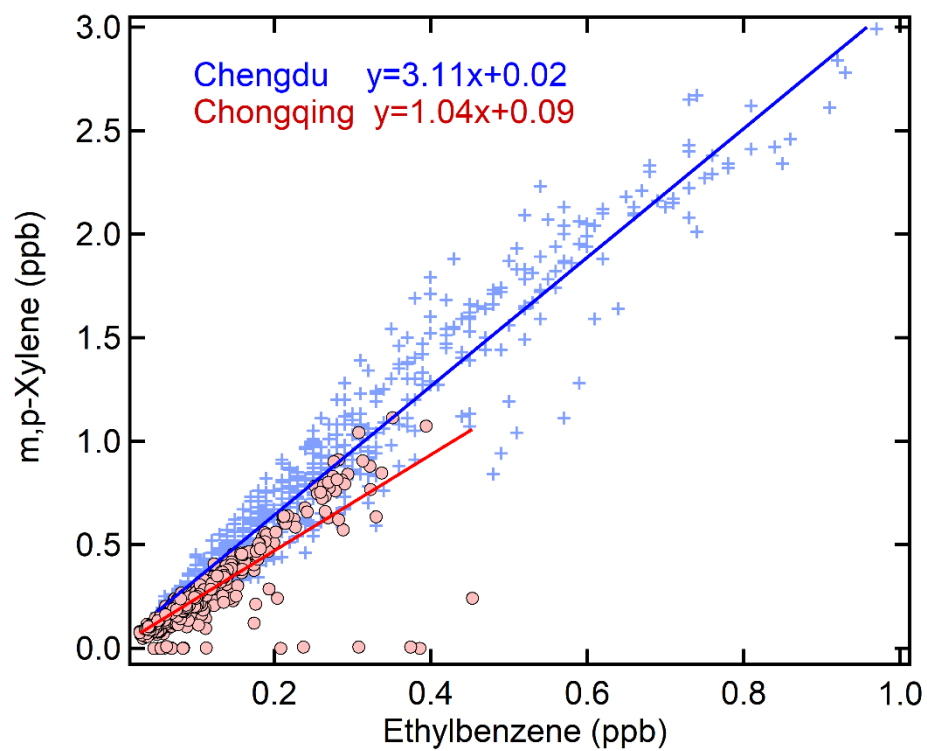

48

49

50

51

Fig S7 Scatter plot of m,p-Xylene and ethylbenzene in Chengdu and Chongqing

52

Table S1 Introduction of monitoring instruments used in this work

| Parameter        | Manufacture       | model                                         | resolution |
|------------------|-------------------|-----------------------------------------------|------------|
| O3               | Thermo Scientific | 49i-D1NAA                                     | 5min       |
| NOx              | Thermo Scientific | 42i-DNMSDAA                                   | 5min       |
| CO               | Thermo Scientific | 48i-DNSAA                                     | 5min       |
| SO2              | Thermo Scientific | 43i-DNSAA                                     | 5min       |
| VOC              | Synspec           | GC955-611/811                                 | 1h         |
| J <sub>NO2</sub> | MetCon            | UF-CCD                                        | 1min       |
| Meteorology      | Lufft             | Chengdu: WS600-UMB<br>Chongqing: WS502-WTB100 |            |

53

54

55 Tables S2. Statistics of VOC mixing ratios measured in Chengdu and Chongqing. The  
 56 S.D. denotes the standard deviation of the mixing ratios of VOC species (Unit: ppbv).

57

| Class    | VOC species        | Chengdu |      | Chongqing |      |
|----------|--------------------|---------|------|-----------|------|
|          |                    | Mean    | S.D. | Mean      | S.D. |
| Alkanes  | Ethane             | 4.1     | 0.6  | 1.6       | 0.2  |
|          | Propane            | 2.8     | 0.7  | 0.6       | 0.1  |
|          | 2-Methylpropane    | 1.0     | 0.2  | 0.3       | 0.1  |
|          | Butane             | 1.5     | 0.4  | 0.7       | 0.2  |
|          | 2-Methylbutane     | 1.3     | 0.3  | 1.0       | 0.1  |
|          | n-Pentane          | 0.3     | 0.1  | 0.3       | 0.1  |
|          | Cyclohexane        | -       | -    | 0.1       | 0.0  |
|          | 2,2-Dimethylbutane | 0.1     | 0.0  | 0.0       | 0.0  |
|          | 2,3-Dimethylbutane | 0.0     | 0.0  | 0.3       | 0.0  |
|          | 2-Methylpentane    | 0.6     | 0.1  | 0.2       | 0.0  |
|          | 3-Methylpentane    | 0.2     | 0.0  | 0.1       | 0.0  |
|          | n-Hexane           | 0.6     | 0.2  | 0.1       | 0.0  |
|          | 2-Methylhexane     | -       | -    | 0.0       | 0.0  |
|          | 3-Methylhexane     | 0.1     | 0.0  | 0.1       | 0.0  |
|          | Heptane            | 0.1     | 0.0  | 0.1       | 0.0  |
|          | Octane             | 0.2     | 0.0  | 0.0       | 0.0  |
| n-Nonane | 0.0                | 0.0     | 0.1  | 0.0       |      |



|           |                        |     |     |     |     |
|-----------|------------------------|-----|-----|-----|-----|
|           | n-Decane               | -   | -   | 0.0 | 0.0 |
|           | Undecane               | 0.0 | 0.0 | 0.0 | 0.0 |
|           | n-Dodecane             | -   | -   | 0.0 | 0.0 |
| Alkenes   | Ethene                 | 0.9 | 0.3 | 0.4 | 0.1 |
|           | Propene                | 0.1 | 0.1 | 0.2 | 0.0 |
|           | 1,3-Butadiene          | -   | -   | 0.0 | 0.0 |
|           | 1-Butene               | 0.1 | 0.0 | 0.1 | 0.0 |
|           | Cis-2-BUTENE           | 0.1 | 0.0 | 0.1 | 0.0 |
|           | Trans-2-Butene         | 0.1 | 0.0 | 0.1 | 0.0 |
|           | Isoprene               | 0.3 | 0.3 | 0.6 | 0.5 |
|           | Cis-2-Pentene          | 0.0 | 0.0 | 0.0 | 0.0 |
|           | 1-Pentene              | 0.1 | 0.0 | 0.1 | 0.0 |
|           | Trans-2-Pentene        | 0.0 | 0.0 | 0.0 | 0.0 |
|           | 1-Hexene               | 0.1 | 0.0 | 0.0 | 0.0 |
| Alkyne    | Ethyne                 | -   | -   | 1.2 | 0.3 |
| Aromatics | Benzene                | 0.4 | 0.1 | 0.3 | 0.1 |
|           | Toluene                | 1.0 | 0.2 | 0.5 | 0.1 |
|           | Ethenylbenzene         | 0.1 | 0.0 | 0.0 | 0.0 |
|           | Ethylbenzene           | 0.3 | 0.1 | 0.1 | 0.1 |
|           | m-Xylene               | 1.0 | 0.3 | 0.4 | 0.2 |
|           | o-Xylene               | 0.4 | 0.1 | 0.2 | 0.1 |
|           | Isopropylbenzene       | 0.0 | 0.0 | 0.0 | 0.0 |
|           | Propylbenzene          | 0.0 | 0.0 | 0.0 | 0.0 |
|           | 3-Ethyltoluene         | 0.0 | 0.0 | 0.0 | 0.0 |
|           | 4-Ethyltoluene         | 0.0 | 0.0 | 0.0 | 0.0 |
|           | 1,3,5-Trimethylbenzene | 0.0 | 0.0 | 0.0 | 0.0 |
|           | 2-Ethyltoluene         | 0.0 | 0.0 | 0.0 | 0.0 |
|           | 1,2,4-Trimethylbenzene | 0.1 | 0.0 | 0.1 | 0.0 |
|           | 1,2,3-Trimethylbenzene | 0.0 | 0.0 | 0.0 | 0.0 |

58  
59  
60

Table S3 Configuration and settings of WRF-CMAQ modeling system

| Item                        | Scheme                                                                      |
|-----------------------------|-----------------------------------------------------------------------------|
| Grid resolution             | outer: 36k×36km; inner: 12×12 km                                            |
| Initial/boundary conditions | WRF: ECMWF reanalysis data<br>CMAQ-outer: profile<br>CMAQ-inner: CMAQ-outer |
| Microphysics                | WRF single-moment 5-class microphysics                                      |
| Short-wave radiation        | Goddard                                                                     |
| Long-Wave radiation         | RRTM                                                                        |
| WRF nudging                 | Yes                                                                         |
| Boundary Layer              | ACM2                                                                        |
| Gas-phase Chemistry         | CB6                                                                         |
| Aerosol option              | AERO6                                                                       |
| Dry deposition              | M3DRY                                                                       |
| Anthropogenic emissions     | MEIC+MIX                                                                    |
| Natural emissions           | MEGAN(version 2.10)                                                         |

61  
62  
63

Table S4 Statistical validation of WRF simulated meteorological parameters.

|                       | MB   | RMSE | R    |
|-----------------------|------|------|------|
| Temperature ( °C)     | -0.6 | 2.1  | 0.91 |
| Relative humidity (%) | -4.5 | 8.6  | 0.86 |
| Wind speed (m/s)      | 1.6  | 1.8  | 0.45 |

64
